# Supplementary material for: Hobit expression by a subset of human liver-resident CD56bright Natural Killer cells
Source: PubMed Central journal article supplement (PMC5532267; doi:10.1038/s41598-017-06011-7), 2017-07-27
Supplement: 41598_2017_6011_MOESM1_ESM.pdf [file 41598_2017_6011_MOESM1_ESM.pdf]

## **Hobit expression defines a subset of liver-resident CD56<sup>bright</sup> Natural Killer cells in the human liver**

**Authors:** Sebastian Lunemann<sup>1†</sup>, Gloria Martrus<sup>1†</sup>, Hanna Goebels<sup>1</sup>, Tobias Kautz<sup>1</sup>, Annika Langeneckert<sup>1</sup>, Wilhelm Salzberger<sup>1</sup>, Martina Koch<sup>2</sup>, Madeleine Bunders<sup>1</sup>, Björn Nashan<sup>2</sup>, Klaas van Gisbergen<sup>3</sup>, Marcus Altfeld<sup>1\*</sup>

**Table 1.** Summary of clinical data for all patients used in the study.

|                              |                      |
|------------------------------|----------------------|
| <b>Number</b>                | <b>7</b>             |
| <b>Gender (f/m; %)</b>       | <b>1/6 (86%)</b>     |
| <b>Age (years)</b>           | <b>55 (25-63)</b>    |
| <b>Weight (kg)</b>           | <b>82 (64-132,5)</b> |
| <b>Size (cm)</b>             | <b>176 (154-182)</b> |
| <b>AST (U/L)</b>             | <b>38 (23-110)</b>   |
| <b>ALT (U/L)</b>             | <b>31 (15-85)</b>    |
| <b>CMV (p/n, % positive)</b> | <b>4/3 (57%)</b>     |

All clinical data is shown as median with minimum to maximum.
